# Supplementary material for: Reactivity study of 3,3-dimethylbutanal and 3,3-dimethylbutanone: Kinetic, reaction products, mechanisms and atmospheric implications
Source: Copernicus journal article supplement (doi:10.5194/egusphere-2024-3241), 2024-10-22
Supplement: Supplementary file 1 [file egusphere-2024-3241-supplement.pdf]

## List of schemes, figures and tables

- Scheme 1S: General Mechanism for the reactions of 33DMbutanone with Cl atom and OH radical
- Scheme 2S. General Mechanism for the reactions of 33DMbutanal with the main atmospheric oxidants
- Figure 1S. Plot of Eq (I) for the reaction of 33DMbutanone with Cl atoms and OH using isopropanol as reference compound.
- Figure 2S. IR absorption bands characteristic of alcoxy nitrates ( $\text{RONO}_2$   $\sim 1663, 1284, 853 \text{ cm}^{-1}$ ) peroxy nitrates ( $\text{ROONO}_2$   $\sim 1718, 1300$  and  $793 \text{ cm}^{-1}$ ) and (\*) peroxy carbonyl nitrates ( $\text{ROO(CO)NO}_2$   $\sim 1830, 1300$  and  $793 \text{ cm}^{-1}$ ) formed in the reaction of 3,3DMbutanal + Cl + NO; 3,3DMbutanal + OH and 3,3DMbutanal + NO. And reference spectra of  $\text{N}_2\text{O}_5$  (synthesized sample).
- Figure 3S. Time-concentration profiles of the products formed and the carbonyl reactant for the reaction of 33DMbutanone (a) and 33DMbutanal with Cl (b).
- Figure 4S. Time-concentration profiles of the nitrated compounds formed for the reaction of 33DMbutanal with  $\text{NO}_3$ .
- Figure 5S. Time-concentration profiles of product formed and the carbonyl reacted for the reaction of 33DMbutanone with OH in the absence of NO.
- Figure 6S. Plots of the reaction product formed versus the consumption of carbonyl in the reaction of Cl atoms with 33DMbutanone (a) and with 33DMbutanal (b).
- Figure 7S. Plots of the reaction product formed versus the consumption of 33DMbutanone in the reaction with OH in the absence of NO.
- Figure 8S. Residual FTIR spectra of the reaction of (a) 33DMbutanone and (b) 33DMbutanal with atmospheric oxidants.
- Figure 9S. Amplified Spectra for the 33DMbutanone + Cl and OH reactions and reference spectra of hydroxyacetone and formic acid.
- Figure 10S. Amplified Spectra for the 33DMbutanal + atmospheric oxidants reactions. Relation of common IR absorption bands;  $1105,9 \text{ cm}^{-1}$  reaction of 33DMbutanal + Cl and 33DMbutanal + Cl + NO (not nitrated compounds);  $872 \text{ cm}^{-1}$  reaction of 33DMbutanal + Cl; 33DMbutanal + Cl + NO and 33DMbutanal + OH (not nitrated compounds);  $810 \text{ cm}^{-1}$  reaction 33DMbutanal + Cl + NO and 33DMbutanal + OH (nitrated compound);  $793 \text{ cm}^{-1}$  reaction of 33DMbutanal + Cl + NO; 33DMbutanal + OH and 33DMbutanal +  $\text{NO}_3$  (nitrated compound);  $721 \text{ cm}^{-1}$  reaction of 33DMbutanal + Cl; 33DMbutanal + Cl + NO and 33DMbutanal + OH (not nitrated compound).
- Figure 11S. Time evolution of the areas of chromatographic peaks of the reactant and products for the reaction of 33DMbutanal with Cl.
- Figure 12S. GC-TOFMS generated chromatograms for the 33DMbutanone + OH + NO at different reaction times using EI ionization mode. Chromatograms have been magnified to better identification.
- Figure 13S. GC-TOFMS generated chromatograms of 33DMbutanal + Cl at different reaction times using EI ionization mode. Chromatograms have been magnified to better identification.
- Figure 14S. GC-TOFMS generated chromatograms 33DMbutanal + Cl + NO at different reaction times using EI ionization mode. Chromatograms have been magnified to better identification.
- Figure 15S. GC-TOFMS generated chromatograms of 33DMbutanal + OH reaction at different reaction times using EI ionization mode.

-Figure 16S. GC-TOFMS generated chromatograms of 33DMbutanal + NO<sub>3</sub> reaction at different reaction times using EI ionization mode. Chromatograms Product 1 and 2 have been magnified to better identification.

-Figure 17S. Chromatogram and mass spectrum of a commercial sample of 33DMbutanoic acid.

-Figure 18S. Amplified Spectra for the 33DMbutanal + Cl atoms in absence of NO together with the references spectra of 3,3-dimethylbutanoic acid and 2,2-dimethylpropanoic acid.

-Table 1S. Attack Percentage in the different sites in the reaction of 33DMbutanal and 33DMbutanone with atmospheric oxidants base on SAR methods

-Table 2S. Mass spectra of the reaction products generate in the reactions of 33DMbutanone with Cl with and without NO using Field and Electron Ionization and 33DMbutanone with OH in presence of NO and electron ionization. Only the more intensity peaks have been considered.

-Table 3S. Mass spectra of the reaction products for the reactions of 33DMbutanal with Cl (with and without NO) and NO<sub>3</sub> and OH radical, using Electron Impact ionization.



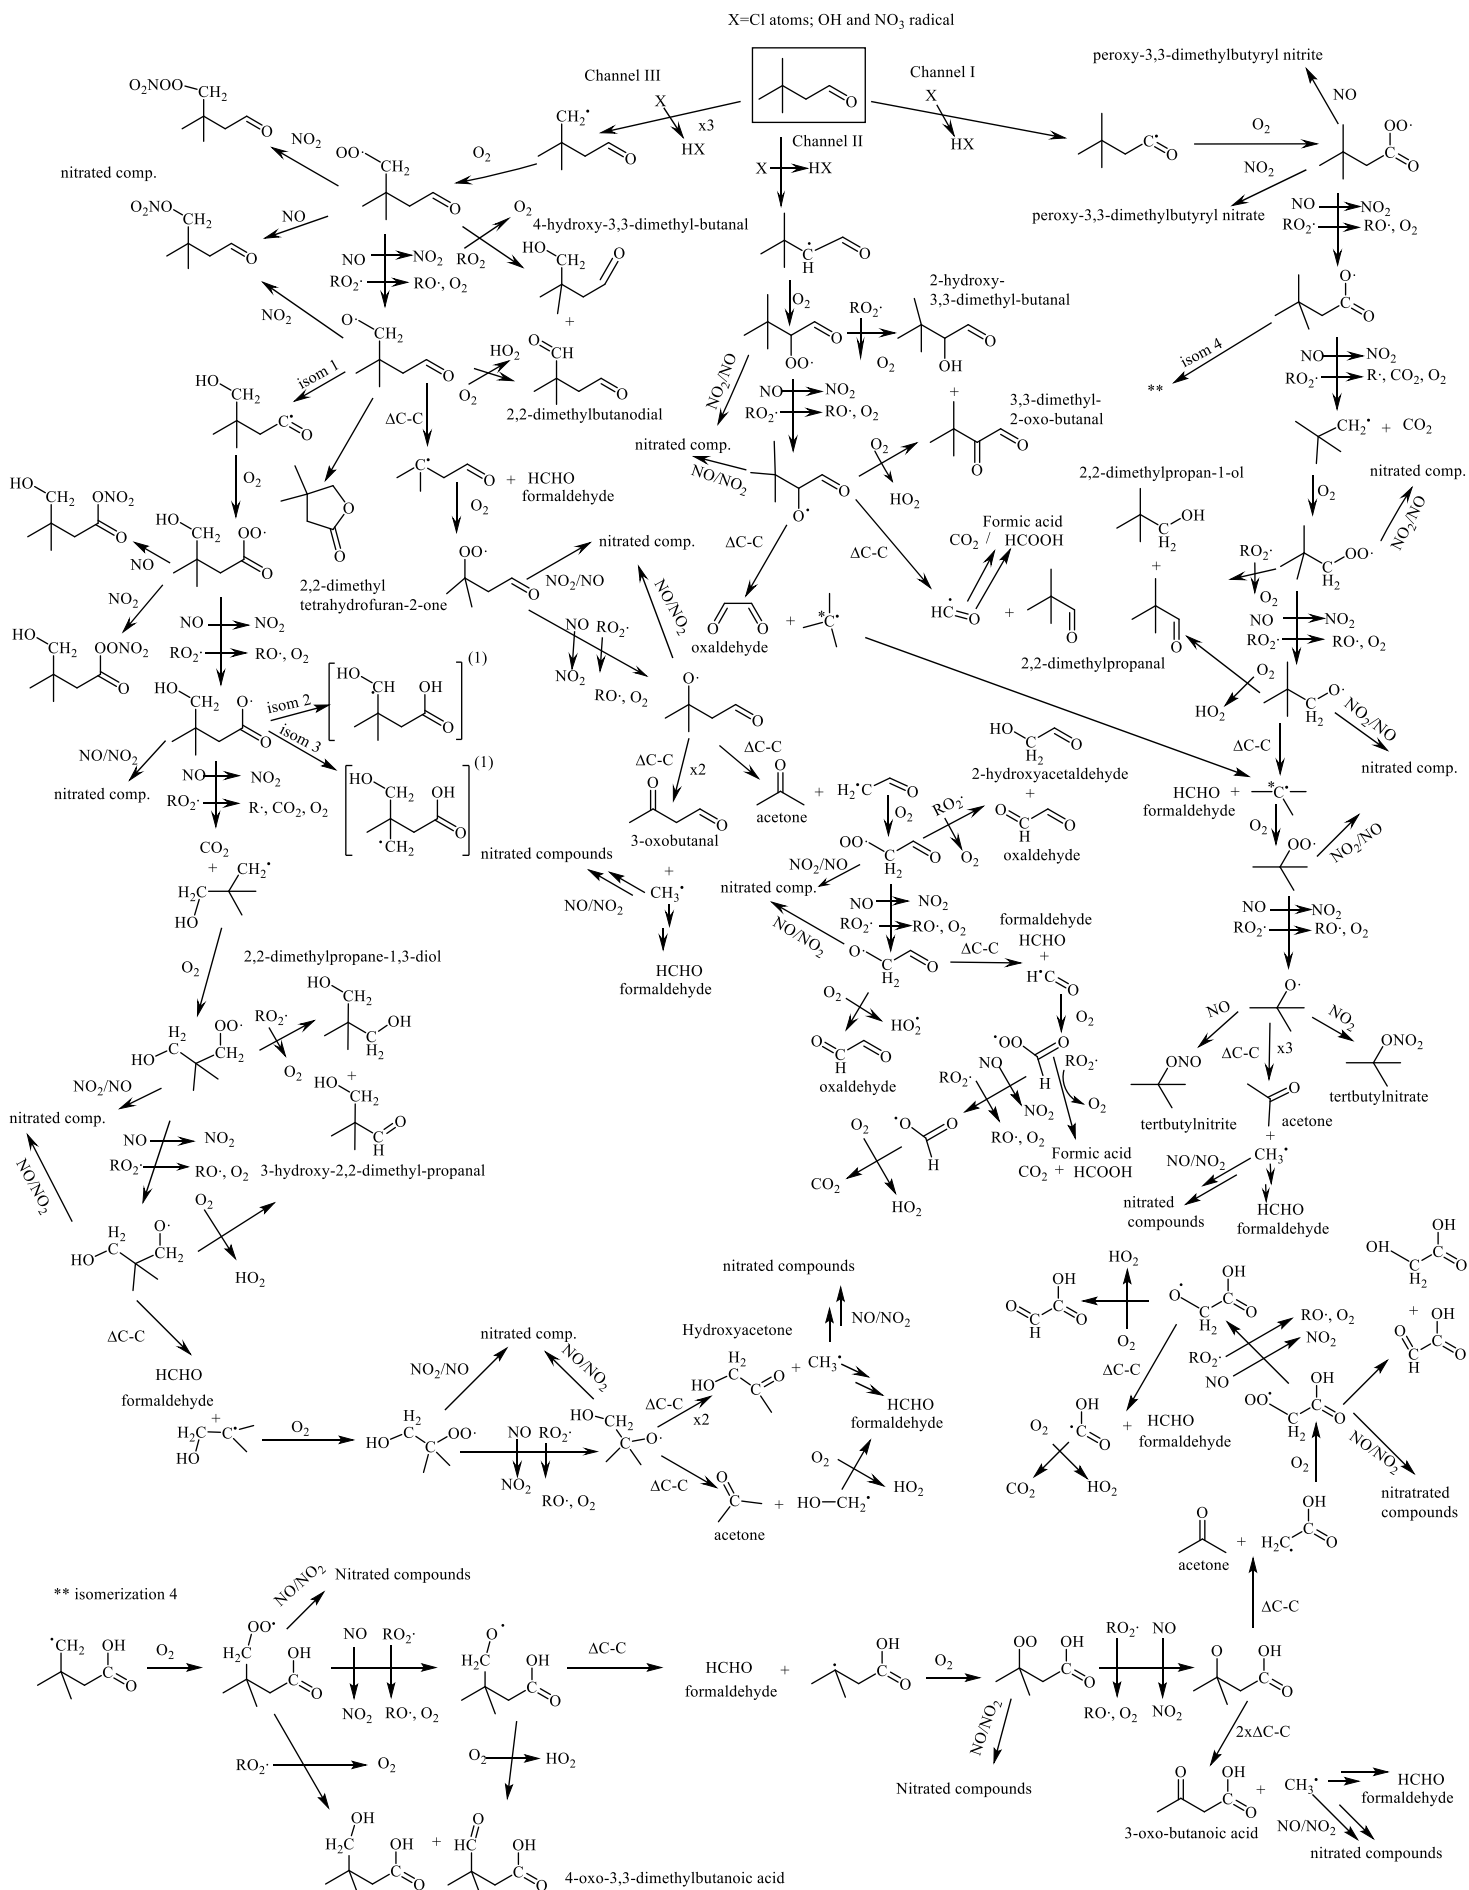

Scheme 2S. General Mechanism for the reactions of 33DMbutanal with the main atmospheric oxidants.



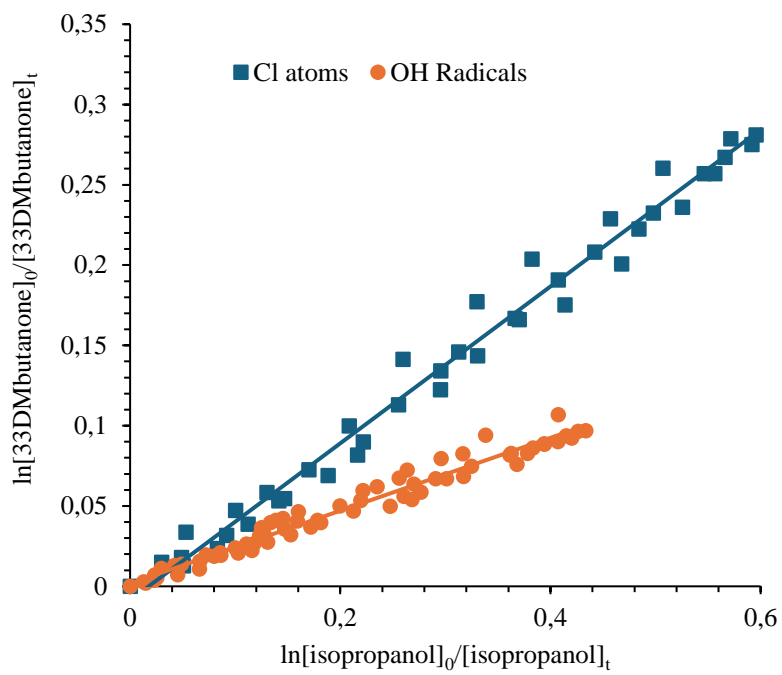

Figure 1S. Plot of Eq (I) for the reaction of 33DMbutanone with Cl atoms and OH using isopropanol as reference compound.

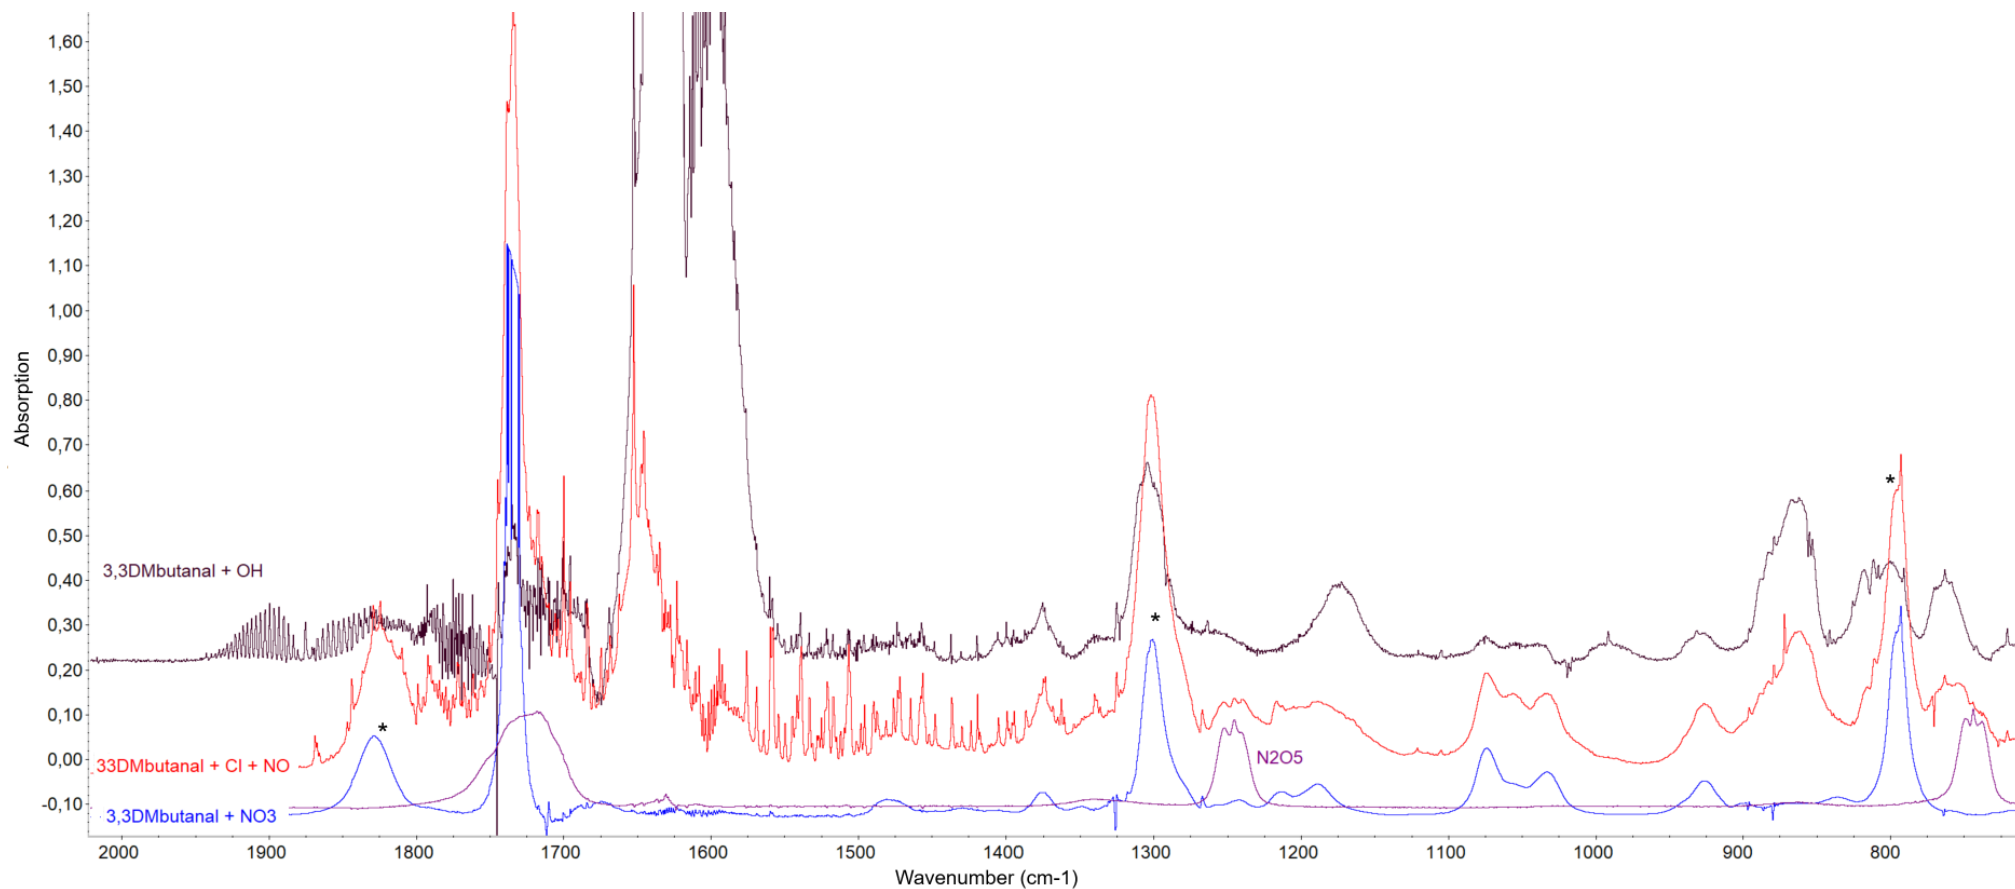

Figure 2S. IR absorption bands characteristic of alkoxy nitrates ( $\text{RONO}_2 \sim 1663, 1284, 853 \text{ cm}^{-1}$ ) peroxy nitrates ( $\text{ROONO}_2 \sim 1718, 1300 \text{ and } 793 \text{ cm}^{-1}$ ) and (\*) peroxy carbonyl nitrates ( $\text{ROO}(\text{CO})\text{NO}_2 \sim 1830, 1300 \text{ and } 793 \text{ cm}^{-1}$ ) formed in the reaction of 3,3DMbutanal + Cl + NO; 3,3DMbutanal + OH and 3,3DMbutanal + NO. And reference spectra of N<sub>2</sub>O<sub>5</sub> (synthesized sample).

a)

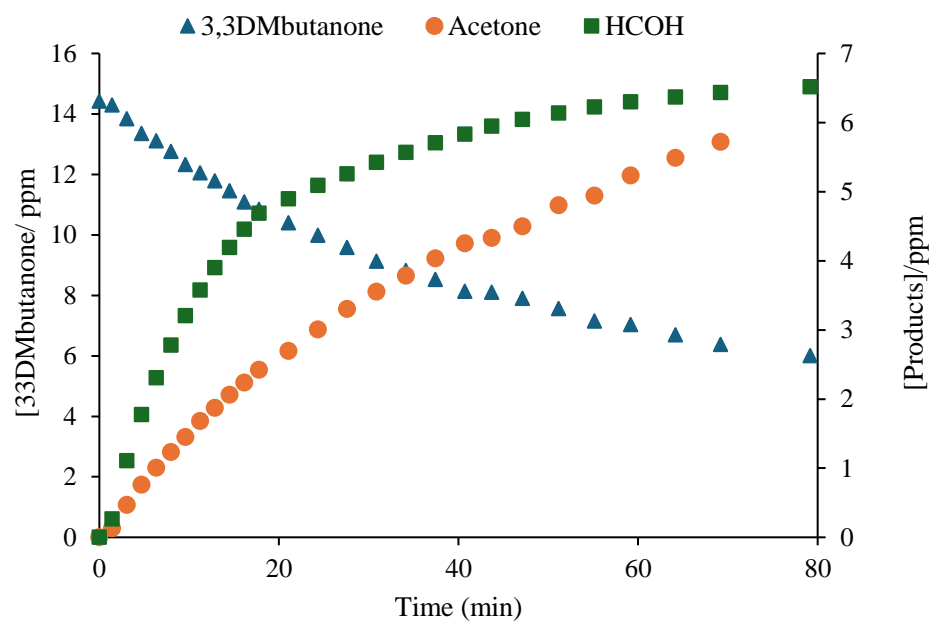

b)

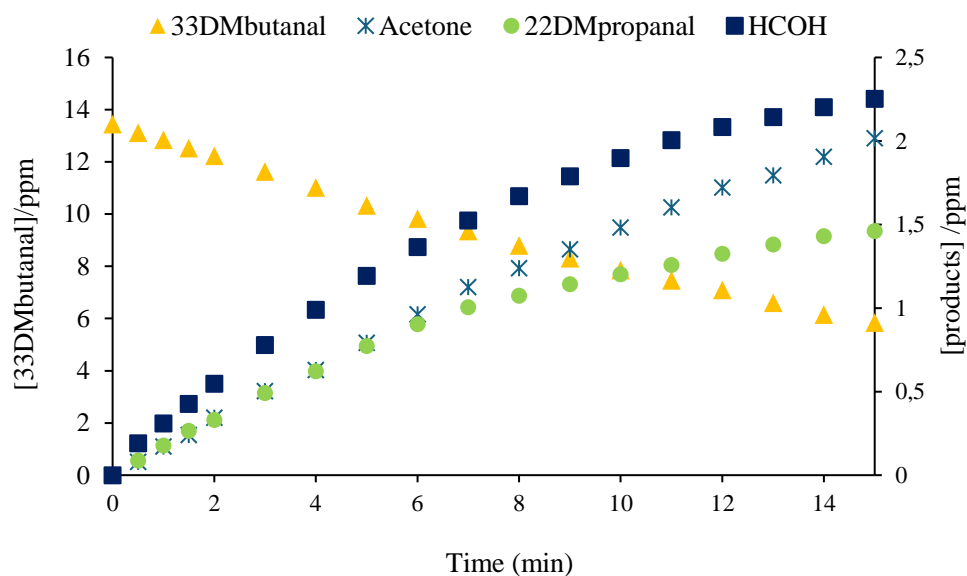

Figure 3S. Time-concentration profiles of the products formed and the carbonyl reactanted for the reaction of 3,3DMbutanone (a) and 3,3DMbutanal with Cl (b).



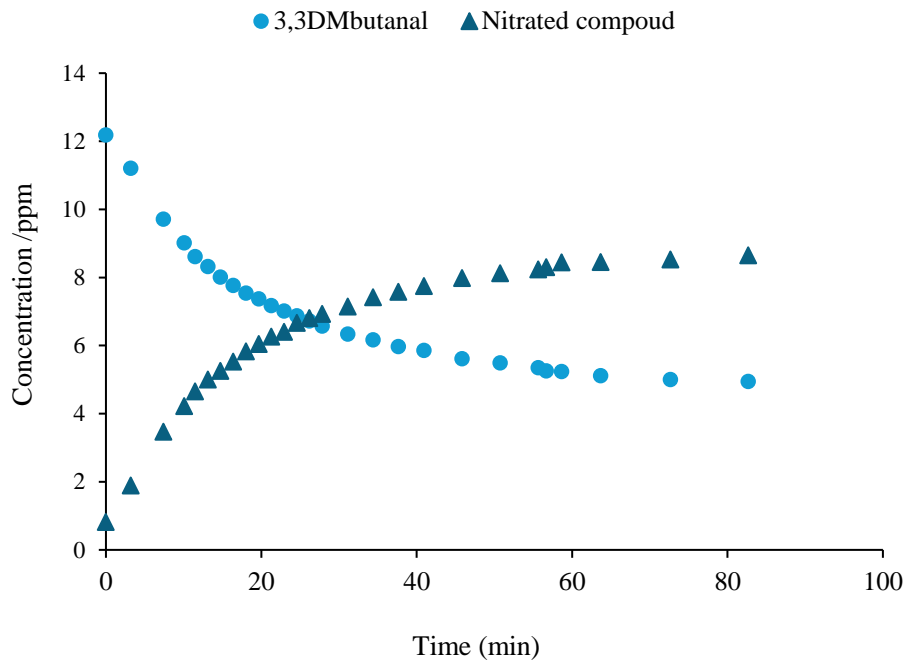

Figure 4S. Time-concentration profiles of the nitrated compounds formed for the reaction of 33DMbutanal with  $\text{NO}_3$ .

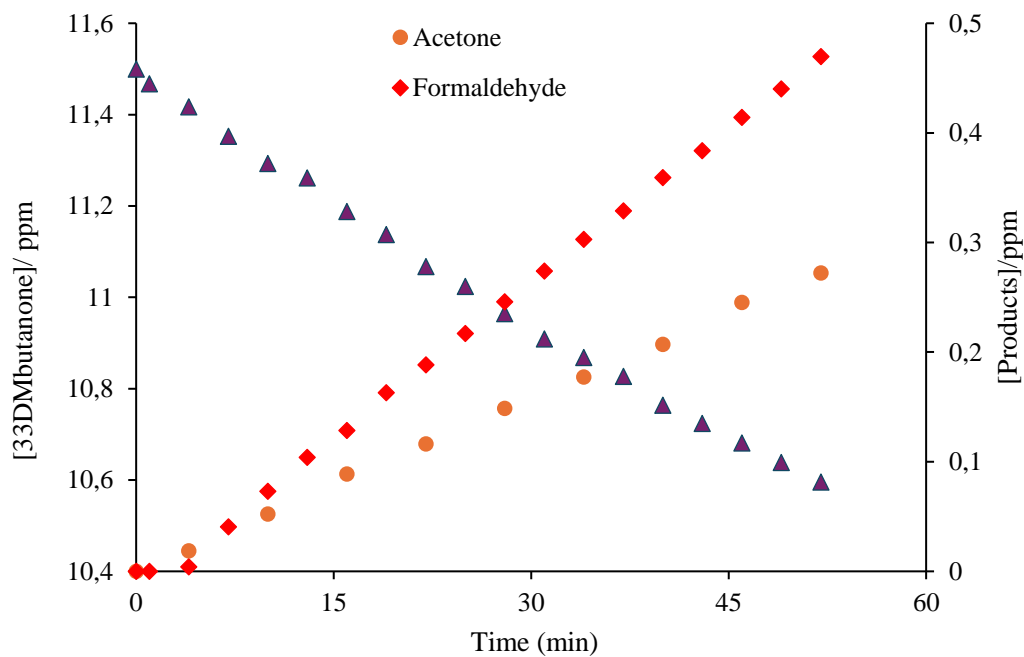

Figure 5S. Time-concentration profiles of product formed and the carbonyl reactanted for the reaction of 33DMbutanone with OH in the absence of NO.

a)

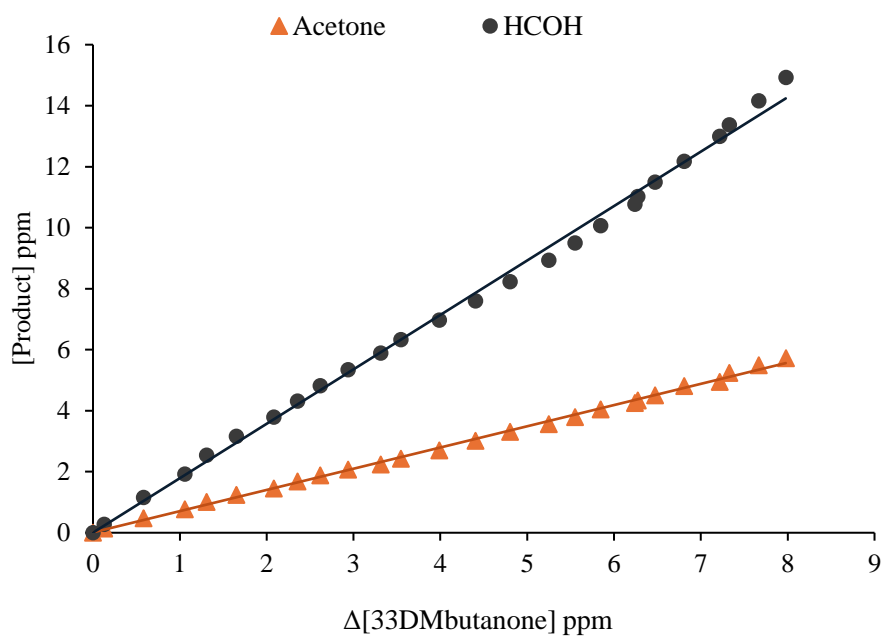

b)

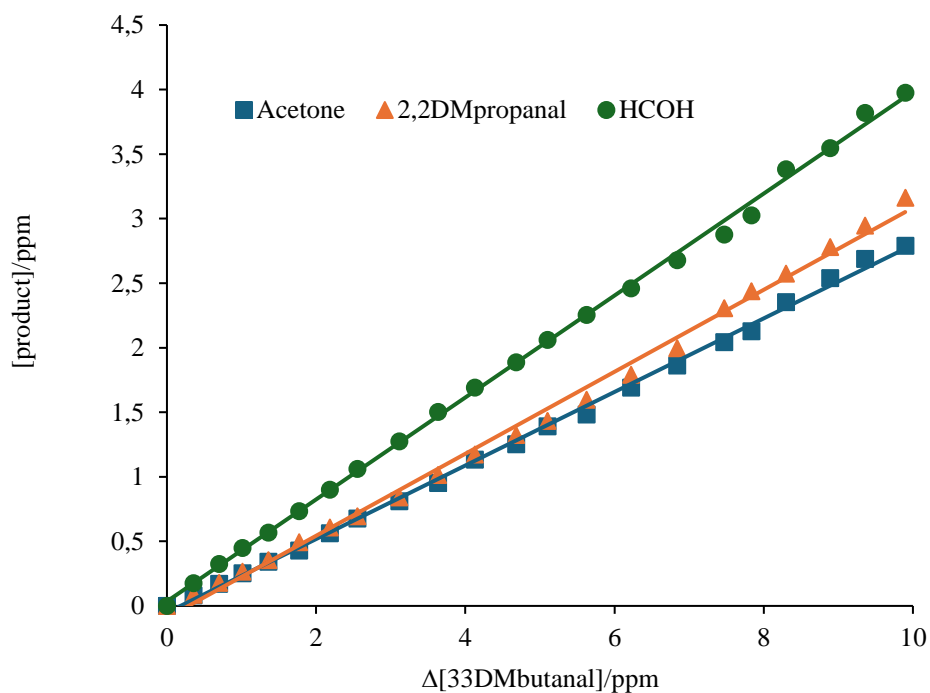

Figure 6S. Plots of the reaction product formed versus the consumption of carbonyl in the reaction of Cl atoms with 33DMbutanone (a) and with 33DMbutanal (b).

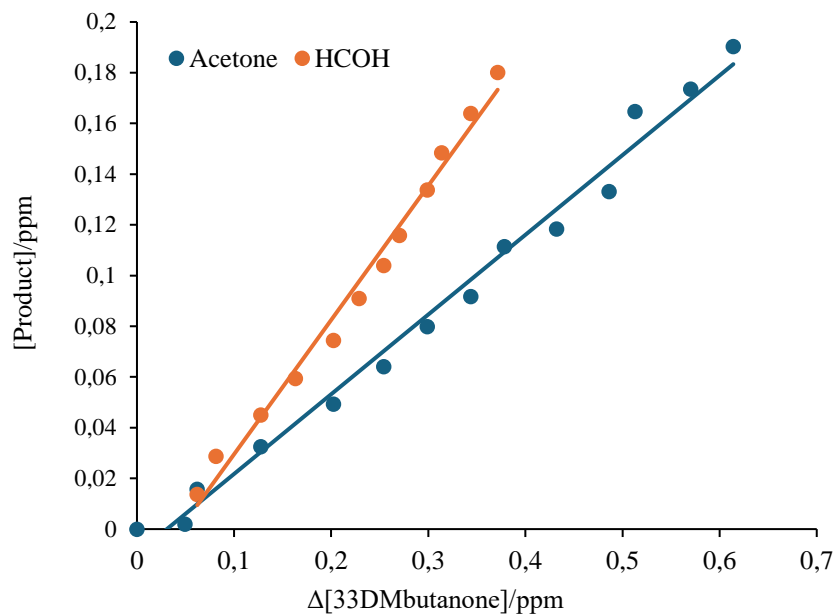

Figure 7S. Plots of the reaction product formed versus the consumption of 33DMbutanone in the reaction with OH in the absence of NO.

a)

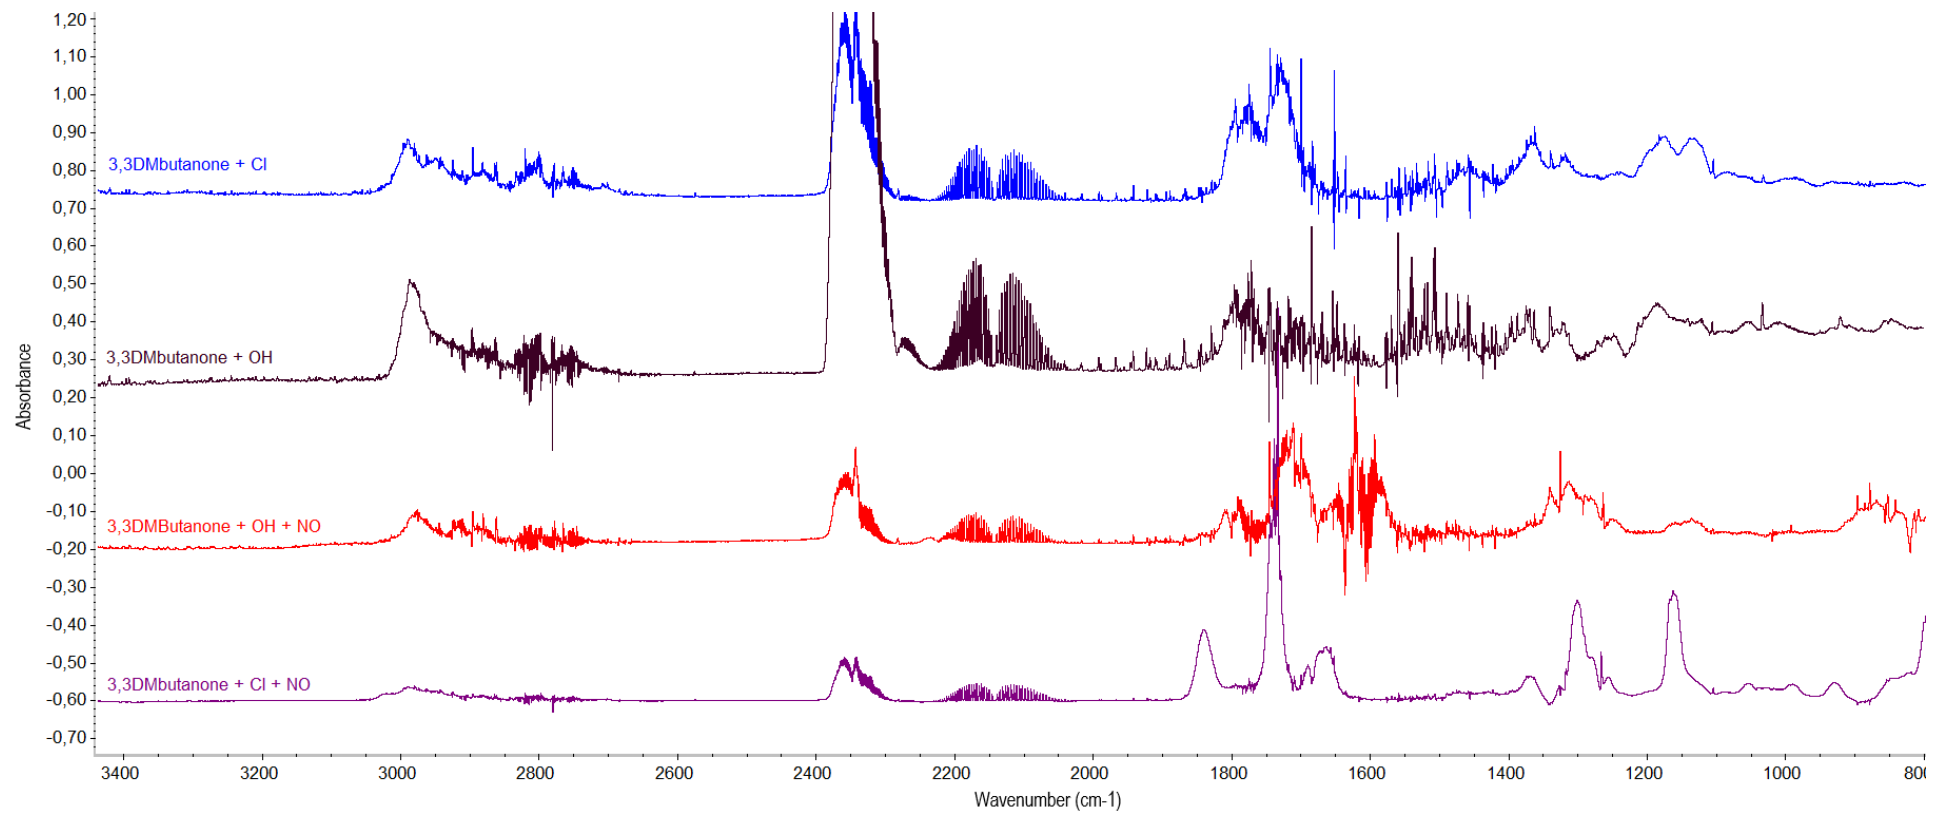

b)

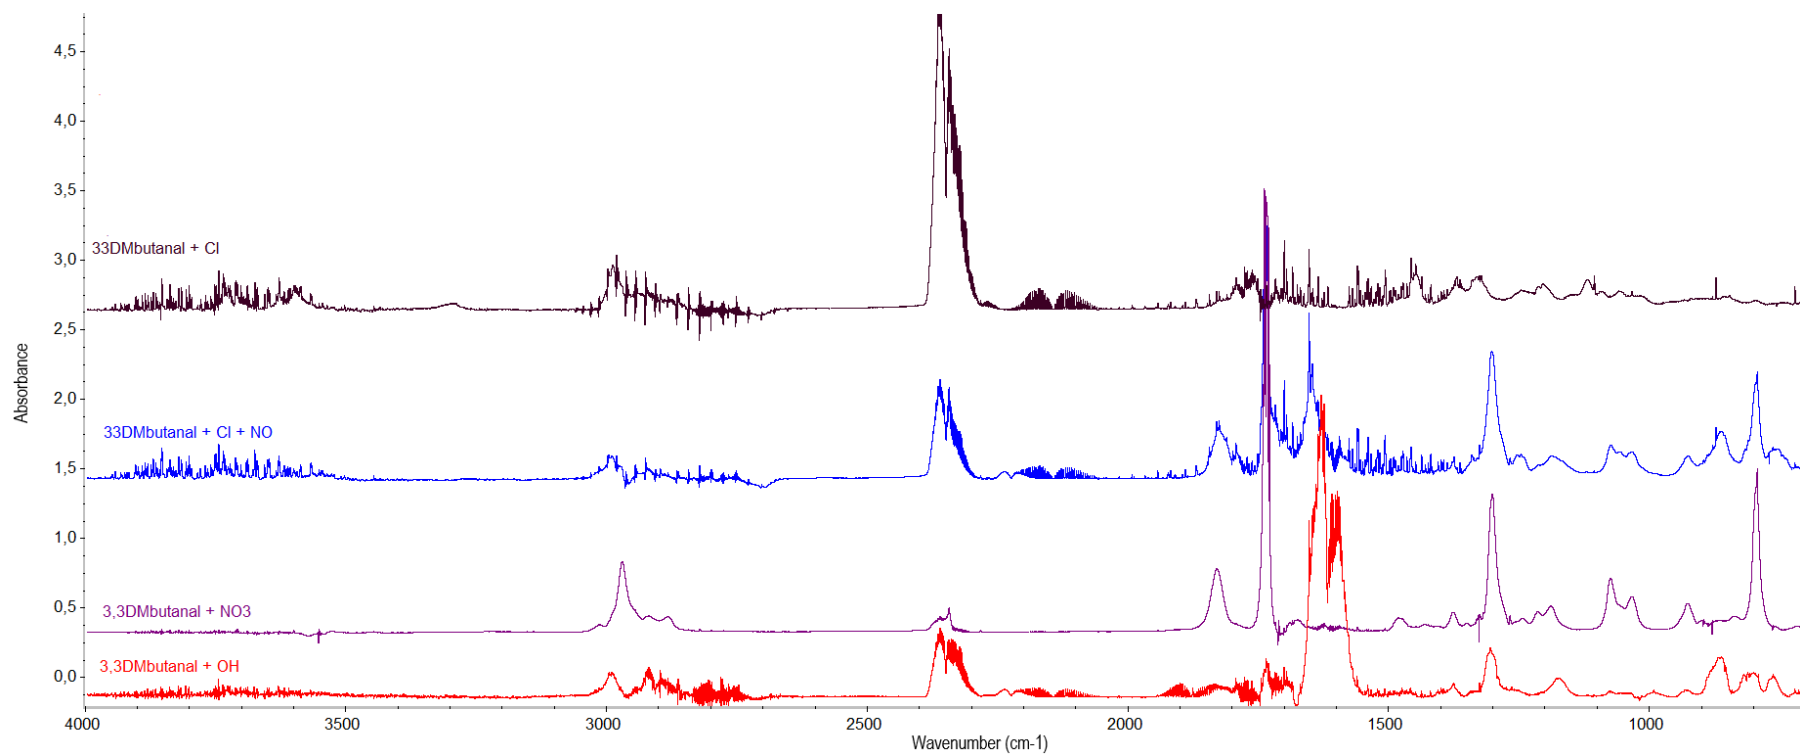

Figure 8S. Residual FTIR spectra of the reaction of (a) 3,3DMbutanone and (b) 3,3DMbutanal with atmospheric oxidants.

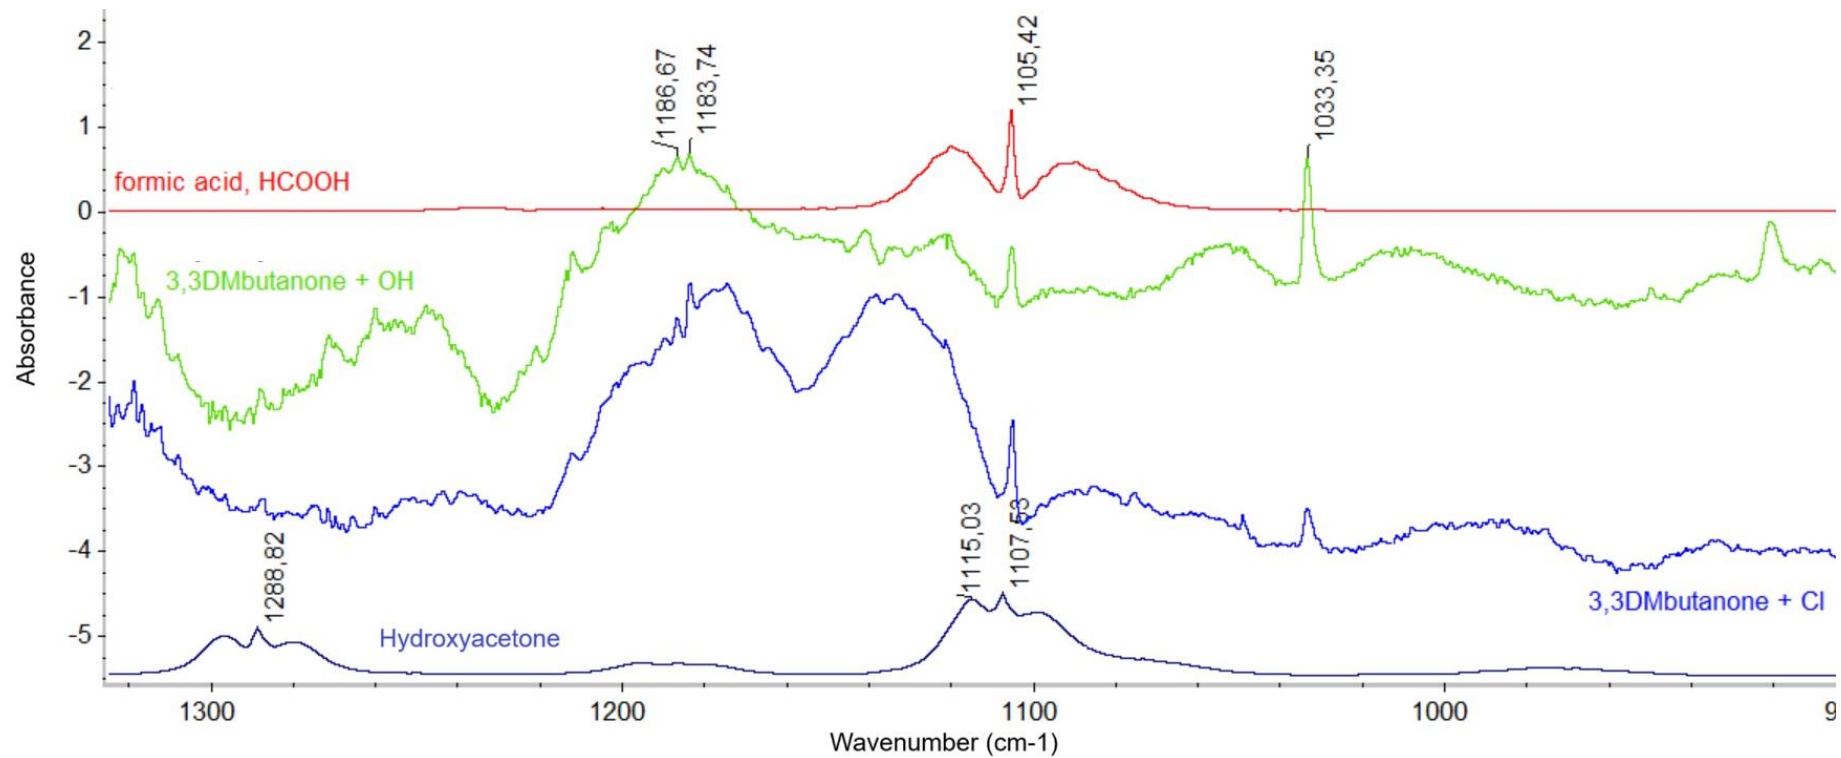

Figure 9S. Amplified Spectra for the 3,3DMbutanone + Cl and OH reactions and reference spectra of hydroxyacetone and formic acid.

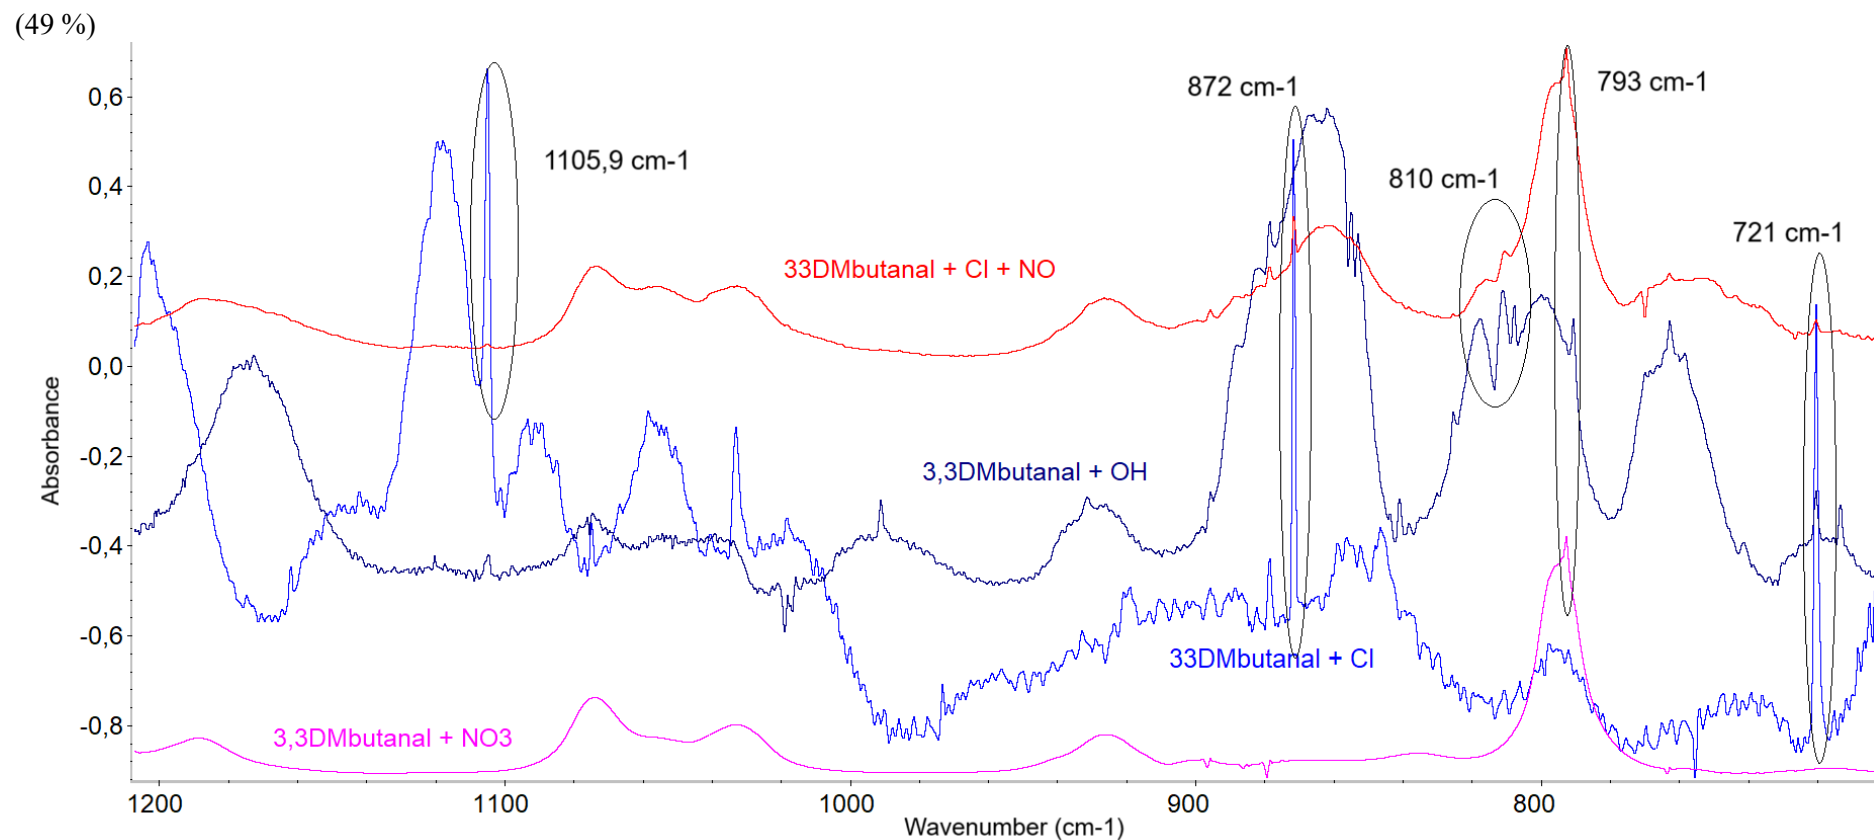

Figure 10S. Amplified Spectra for the 33DMbutanal + atmospheric oxidants reactions. Relation of common IR absorption bands; 1105,9 cm<sup>-1</sup> reaction of 33DMbutanal + Cl and 33DMbutanal + Cl + NO (not nitrated compounds); 872 cm<sup>-1</sup> reaction of 33DMbutanal + Cl; 33DMbutanal + Cl + NO and 33DMbutanal + OH (not nitrated compounds); 810 cm<sup>-1</sup> reaction 33DMbutanal + Cl + NO and 33DMbutanal + OH (nitrated compound); 793 cm<sup>-1</sup> reaction of 33DMbutanal + Cl + NO; 33DMbutanal + OH and 33DMbutanal + NO<sub>3</sub> (nitrated compound); 721 cm<sup>-1</sup> reaction of 33DMbutanal + Cl; 33DMbutanal + Cl + NO and 33DMbutanal + OH (not nitrated compound).

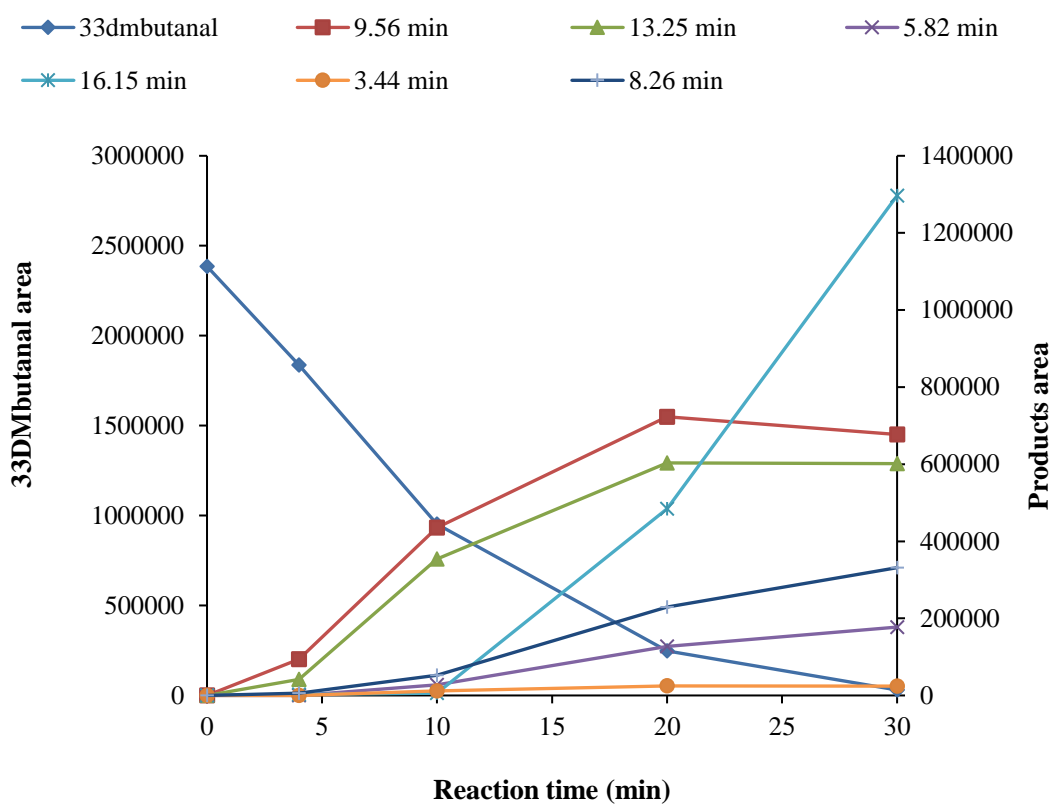

Figure 11S. Time evolution of the areas of chromatographic peaks of the reactant and products for the reaction of 33DMbutanal with Cl.



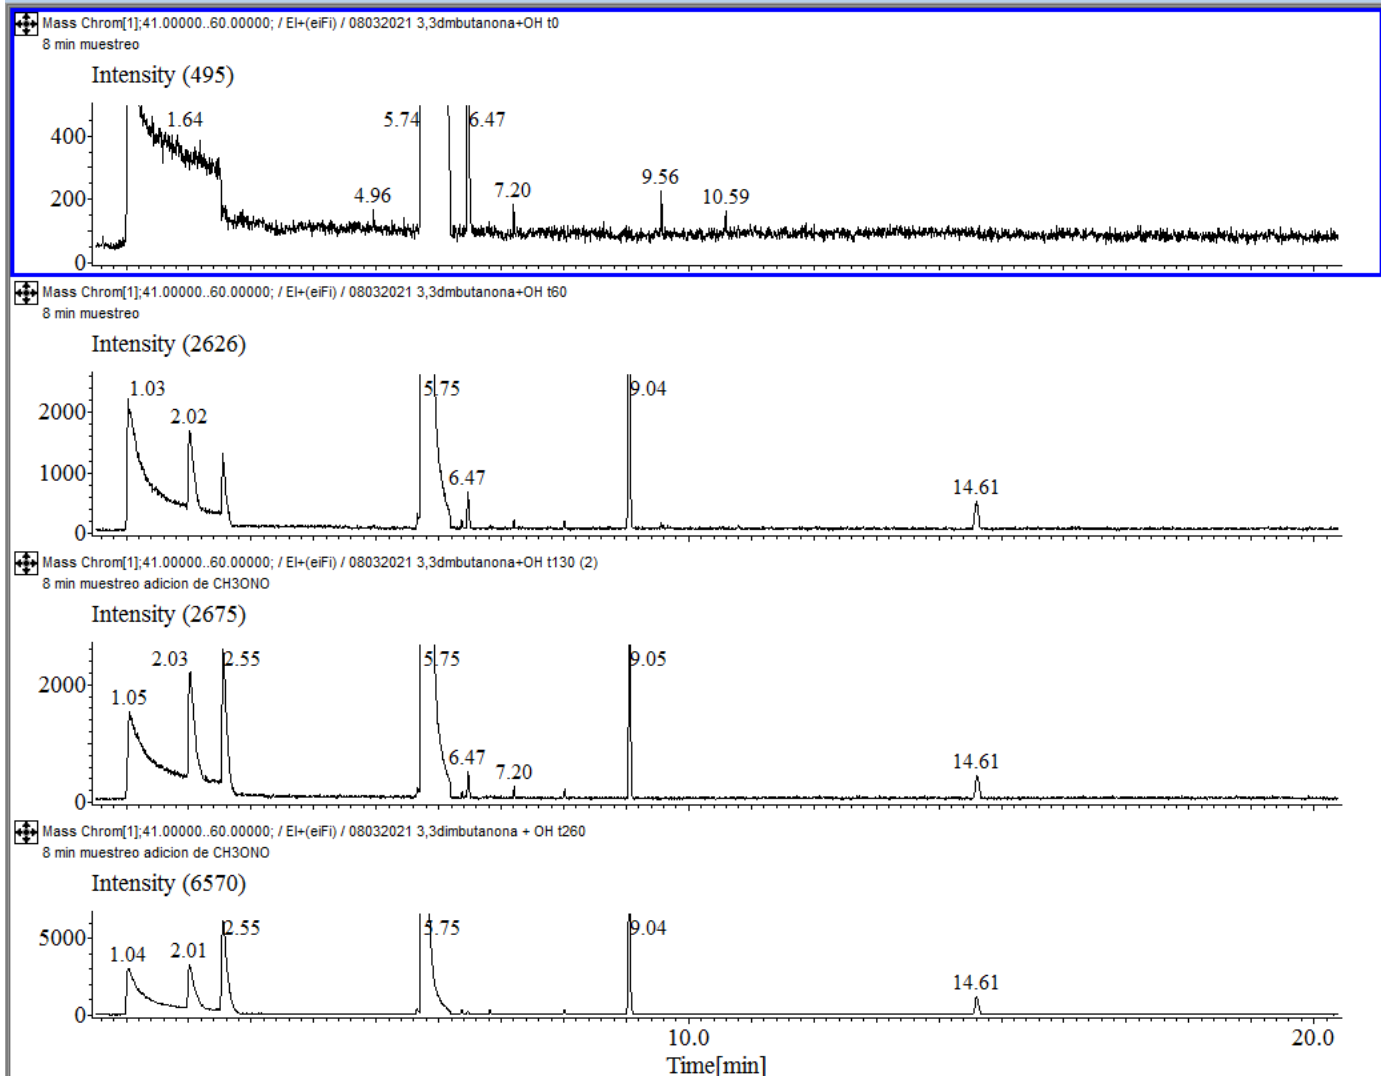

Figure 12S. GC-TOFMS generated chromatograms for the 33DMbutanone + OH +NO at different reaction times using EI ionization mode. Chromatograms have been magnified to better identification.

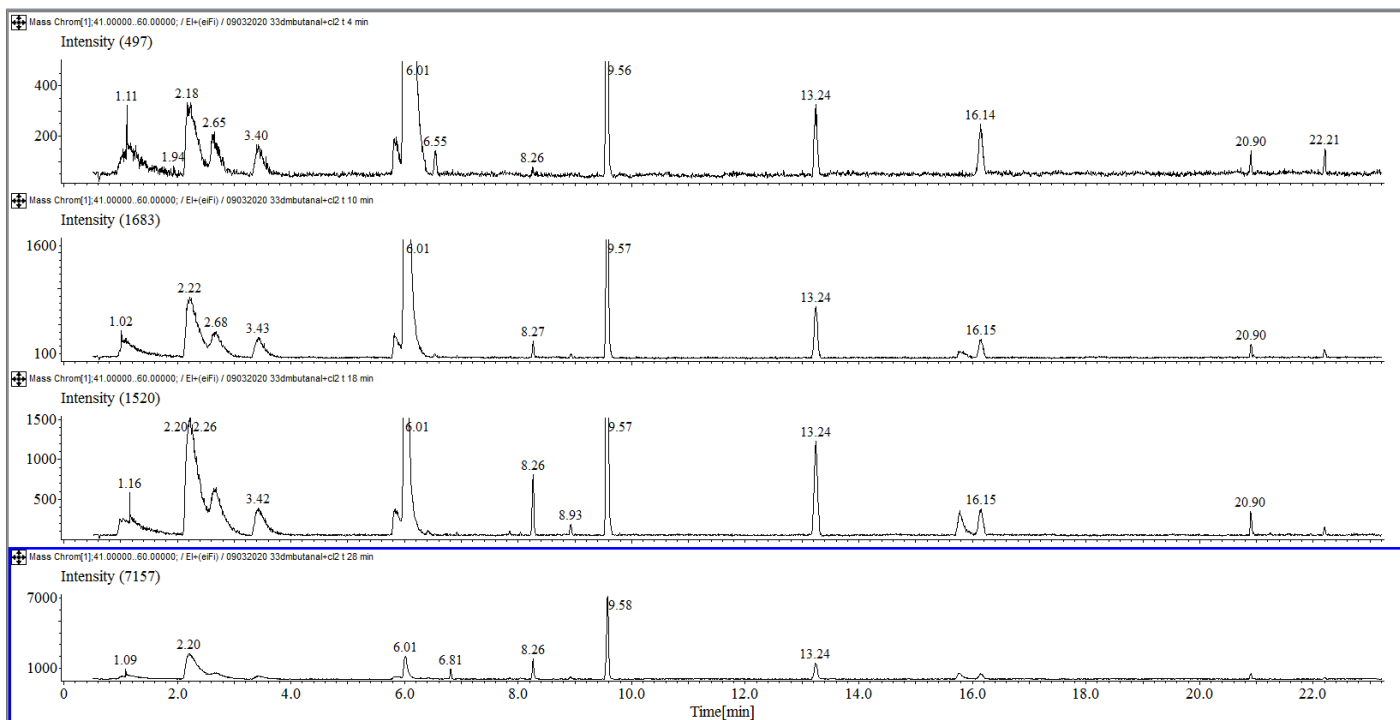

Figure 13S. GC-TOFMS generated chromatograms of 33DMbutanal + Cl at different reaction times using EI ionization mode. Chromatograms have been magnified to better identification.

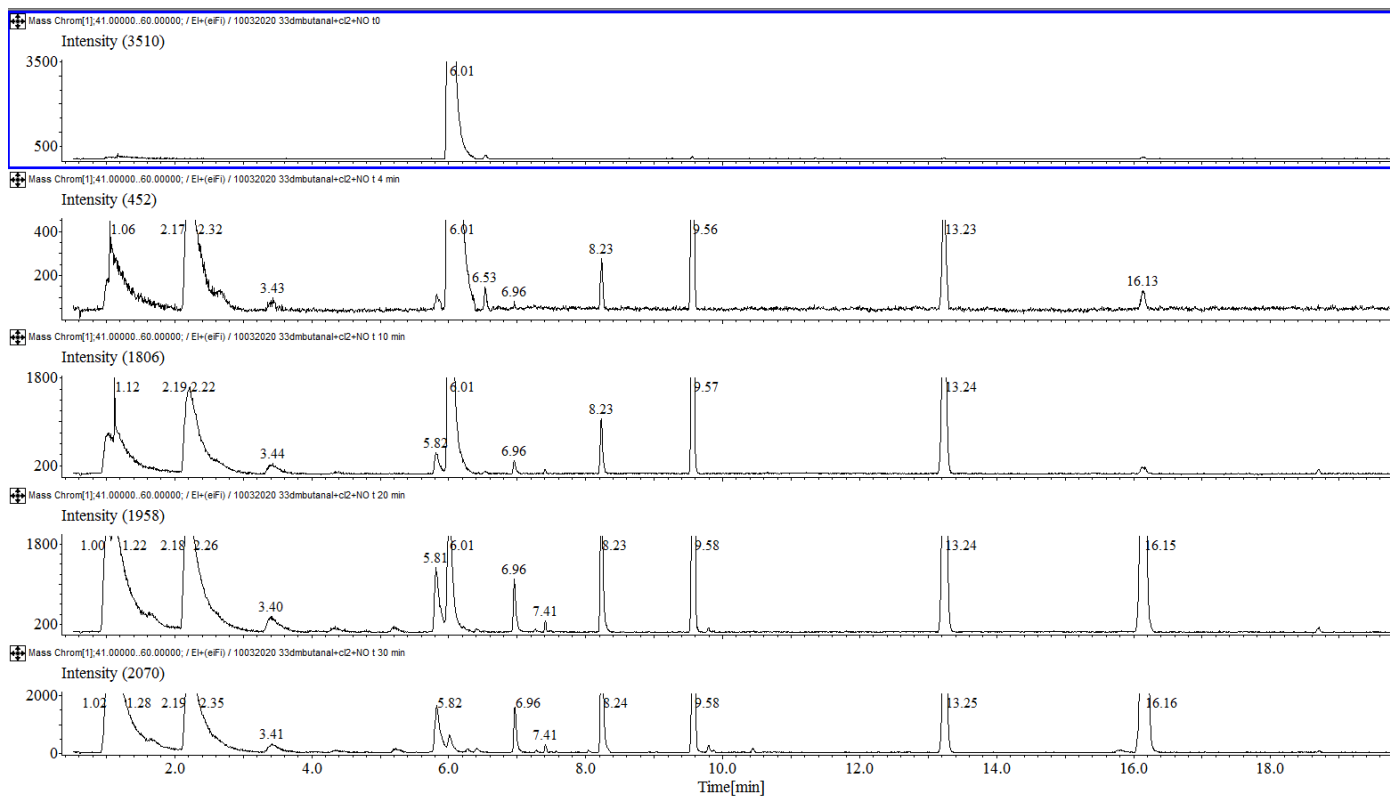

Figure 14S. GC-TOFMS generated chromatograms 33DMbutanal + Cl + NO at different reaction times using EI ionization mode. Chromatograms have been magnified to better identification.

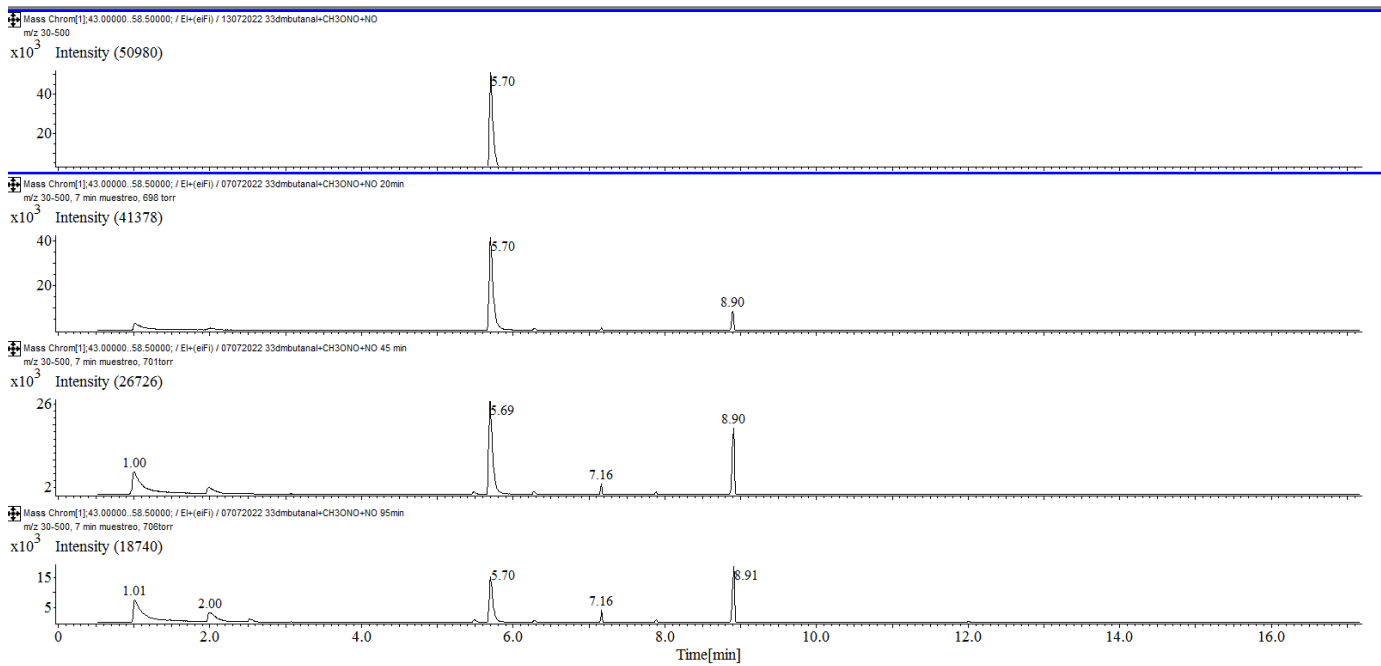

Figure 15S. GC-TOFMS generated chromatograms of 33DMbutanal + OH reaction at different reaction times using EI ionization mode.

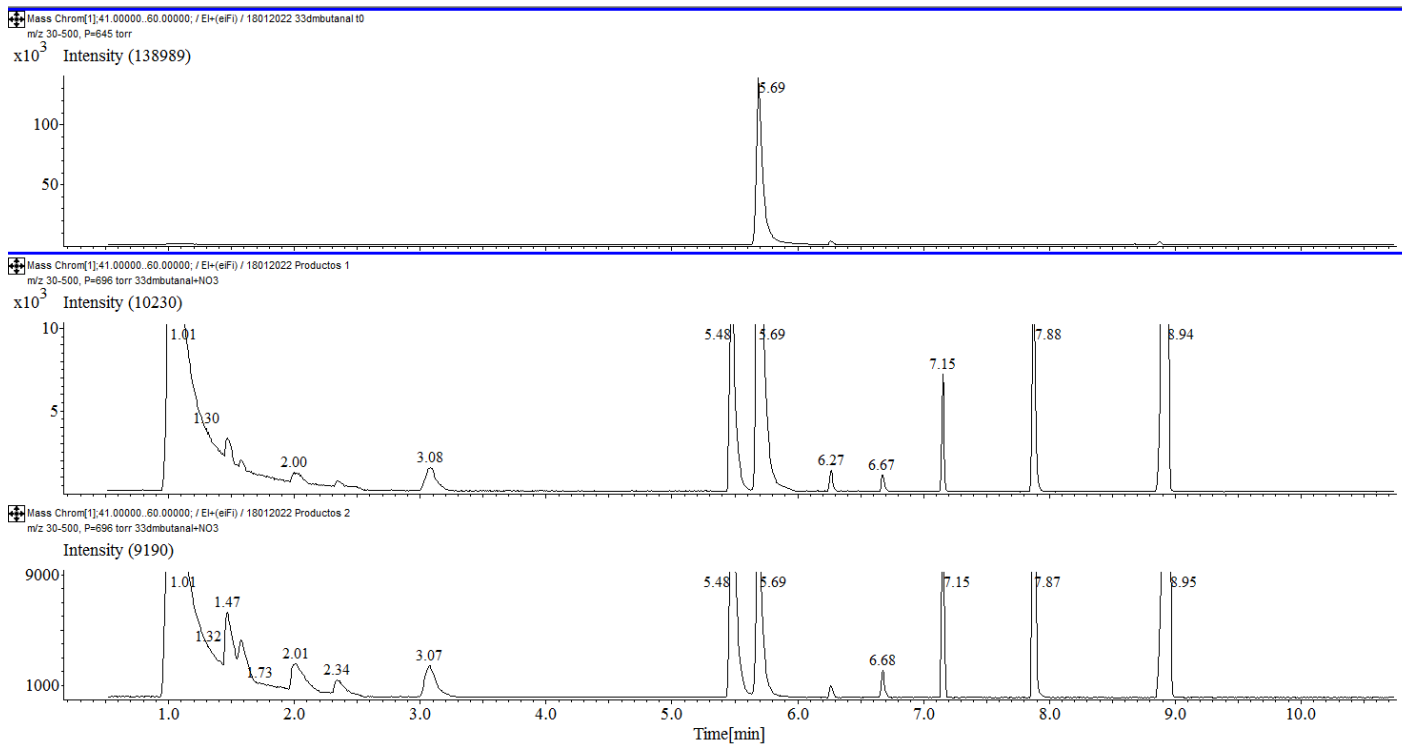

Figure 16S. GC-TOFMS generated chromatograms of 33DMbutanal + NO<sub>3</sub> reaction at different reaction times using EI ionization mode. Chromatograms Product 1 and 2 have been magnified to better identification.

(a)

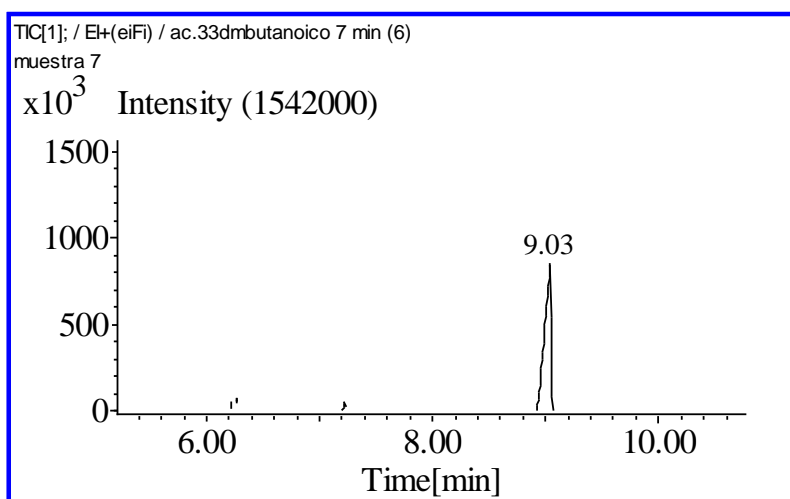

(b)

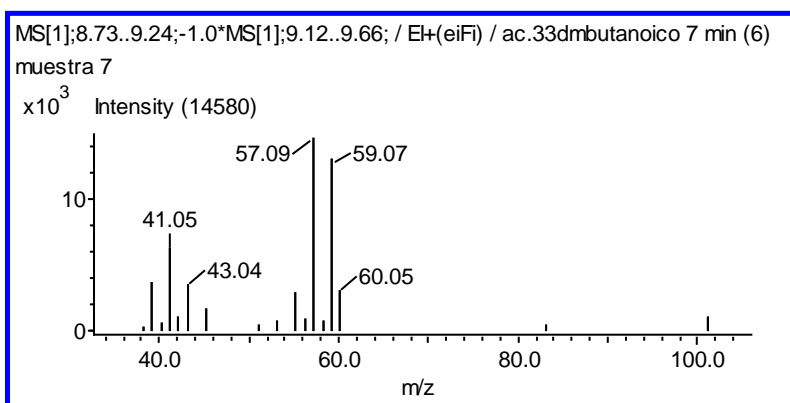

Figure 17S. GC-TOFMS chromatogram (a) and mass spectrum (b) of a commercial sample of 33DMbutanoic acid.

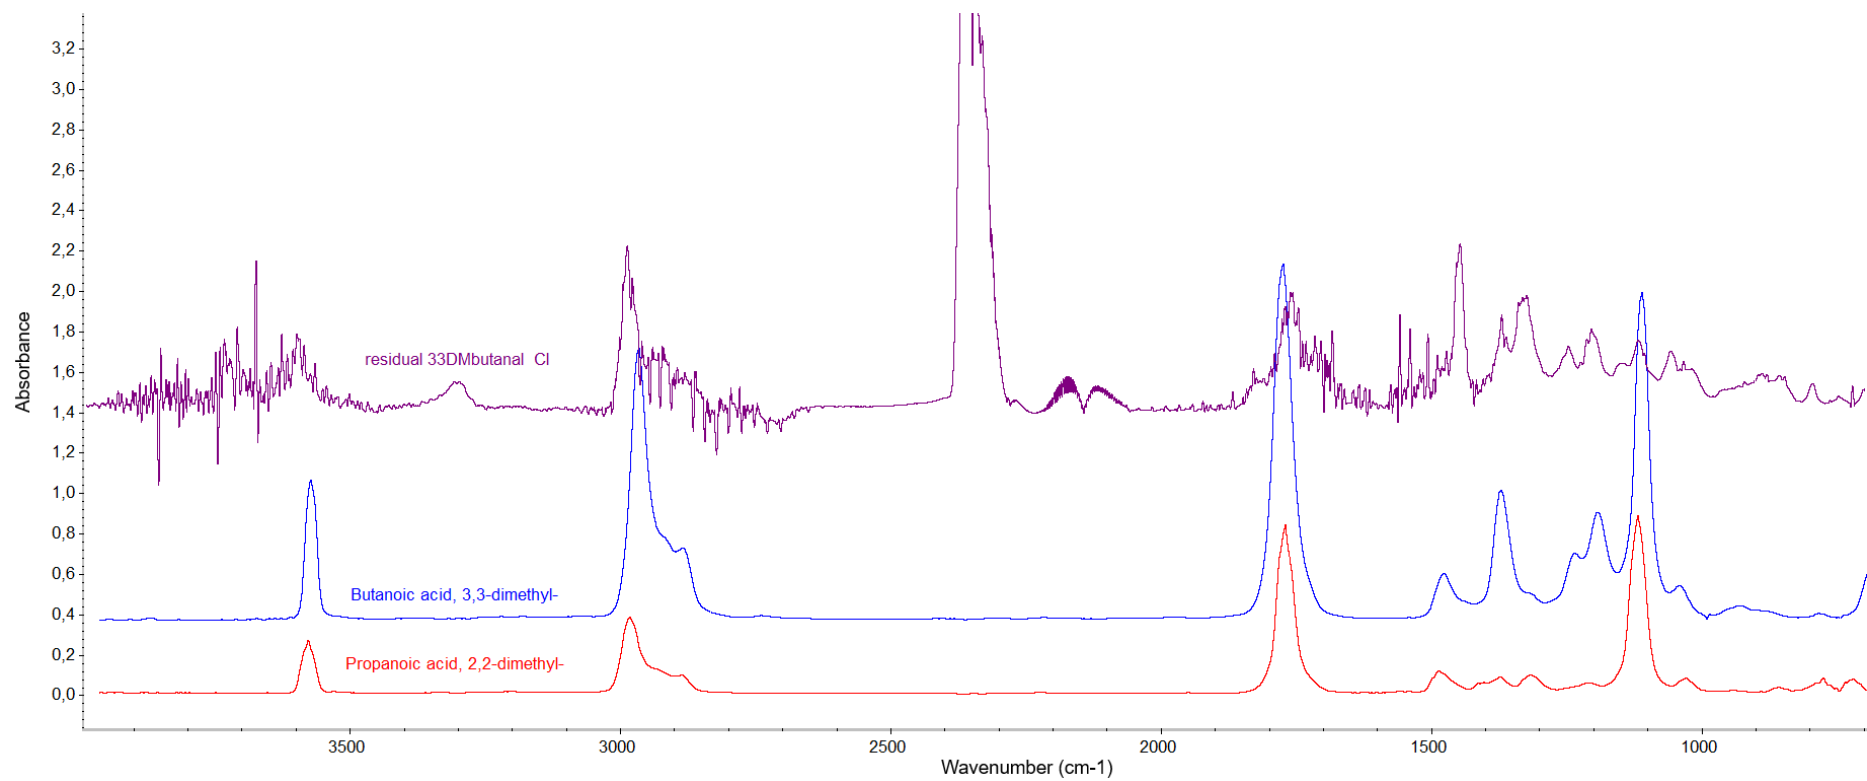

Figure 18S. Amplified Spectra for the 33DMbutanal + Cl atoms in the absence of NO together with the references spectra of 33DMbutanoic acid and 22DMpropanoic acid.

Table 1S. Attack Percentage in the different sites in the reaction of 33DMbutanal and 33DMbutanone with atmospheric oxidants base on SAR methods

| Compound                                                                                                   |                                | 33DMbutanal                                                                                                                |       |        | 33DMbutanone                                                                                     |       |
|------------------------------------------------------------------------------------------------------------|--------------------------------|----------------------------------------------------------------------------------------------------------------------------|-------|--------|--------------------------------------------------------------------------------------------------|-------|
| Structure                                                                                                  |                                | 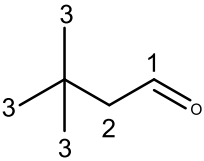                                          |       |        |               |       |
| * SAR method                                                                                               |                                | $k_{\text{abs}} = 3(k_{\text{prim}}F(\text{C})) + k_{\text{sec}}F(\text{C})F(-\text{CHO}) + k_{-\text{COH}}F(\text{CH}_2)$ |       |        | $k_{\text{abs}} = 3(k_{\text{prim}}F(-\text{CR}_2\text{CO}-)) + (k_{\text{prim}}F(-\text{CO}-))$ |       |
| Attack site                                                                                                |                                | 1                                                                                                                          | 2     | 3**    | 1                                                                                                | 2**   |
| Rate coefficient<br>( $\text{cm}^3 \text{ molecule}^{-1} \text{ s}^{-1}$ )                                 | * <sup>a</sup> Cl              | 0.405                                                                                                                      | 0.282 | 0.224  | 0.0105                                                                                           | 0.159 |
|                                                                                                            | * <sup>b</sup> OH              | 20.75                                                                                                                      | 0.861 | 0.167  | 0.102                                                                                            | 0.53  |
|                                                                                                            | * <sup>c</sup> NO <sub>3</sub> | 1.274                                                                                                                      | 0.743 | 0.0002 | -                                                                                                | -     |
| Overall rate coefficient<br>( $k_{\text{abs}}$ )<br>( $\text{cm}^3 \text{ molecule}^{-1} \text{ s}^{-1}$ ) | <sup>a</sup> Cl                | 0.405+0.282+0.224x3=1.361                                                                                                  |       |        | 0.0105+0.159x3=0.49                                                                              |       |
|                                                                                                            | <sup>b</sup> OH                | 20.75+0.861+0.167x3=22.11                                                                                                  |       |        | 0.102+0.53x3=1.69                                                                                |       |
|                                                                                                            | <sup>c</sup> NO <sub>3</sub>   | 1.274+0.743+0.0002x3=2.017                                                                                                 |       |        | -                                                                                                |       |
| Attack Percentages (%)                                                                                     | Cl                             | ~30                                                                                                                        | ~21   | ~49    | ~2                                                                                               | ~98   |
|                                                                                                            | OH                             | ~94                                                                                                                        | ~4    | ~2     | ~6                                                                                               | ~94   |
|                                                                                                            | NO <sub>3</sub>                | ~63                                                                                                                        | ~37   | 0      | -                                                                                                | -     |

<sup>a</sup>10<sup>-10</sup>; <sup>b</sup>10<sup>-12</sup>; <sup>c</sup>10<sup>-14</sup>. \*SAR parameters Cl reaction from Calvert et al 2011, Farrugia et al 2015 and Carter et al 2021; EPA Suit™ for OH reaction and Kerdouci et al 2014 for NO<sub>3</sub> reactions. \*\*3 attack site.



Table 2S. Mass spectra of the reaction products generate in the reactions of 33DMbutanone with Cl with and without NO using Field and Electron Ionization and 33DMbutanone with OH in presence of NO and electron ionization. Only the more intensity peaks have been considered.

| tr (min)            | Mass Spectrum                                                                       |                                                                                      |          |                                                                                       | Reaction product                                                                      |                            |
|---------------------|-------------------------------------------------------------------------------------|--------------------------------------------------------------------------------------|----------|---------------------------------------------------------------------------------------|---------------------------------------------------------------------------------------|----------------------------|
|                     | Field Ionization                                                                    |                                                                                      | tr (min) | Electron ionization                                                                   |                                                                                       |                            |
|                     | Without NO                                                                          | With NO                                                                              |          | Cl                                                                                    |                                                                                       | OH                         |
|                     | Without NO                                                                          | With NO                                                                              | With NO  | With NO                                                                               |                                                                                       |                            |
| 2.2<br>All channels | 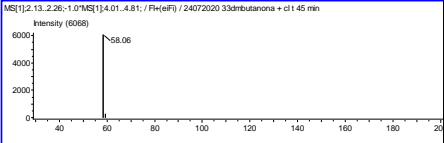   |    | 2*       |    |    | Acetone                    |
| 2.55                |                                                                                     |                                                                                      |          |    | Nitrated compound                                                                     |                            |
| 2.87                |    |                                                                                      |          |                                                                                       |    |                            |
| 5.59                |                                                                                     |                                                                                      | 5.59     |    |    |                            |
| 6                   |   |   | 5.73*    |   |   | 33DMbutanone<br>(reactant) |
| 7.03                |  |                                                                                      | 6.81*    |  |  |                            |
| 8.28                |  |  | 8.00*    |  |  |                            |

|       |  |  |       |  |  |                                          |
|-------|--|--|-------|--|--|------------------------------------------|
| 9.04  |  |  | 9.04* |  |  | <p>2,2-dimethyl-3-butylperoxynitrite</p> |
| 9.44  |  |  |       |  |  |                                          |
| 9.68  |  |  | 9.68  |  |  |                                          |
| 10.26 |  |  | 10.26 |  |  |                                          |
|       |  |  | 14.57 |  |  |                                          |

\*Shorter Time retention than FI experiment due to a new chromatographic column.

Table 3S. Mass spectra of the reaction products for the reactions of 3,3DMbutanal with Cl (with and without NO) and NO<sub>3</sub> and OH radical, using Electron Impact ionization.

| t <sub>r</sub> (min)            | Reaction<br>3,3DMbutanal +                                                          |                                                                                      |                                                                                       | Reaction product                                                                    |                                                 |
|---------------------------------|-------------------------------------------------------------------------------------|--------------------------------------------------------------------------------------|---------------------------------------------------------------------------------------|-------------------------------------------------------------------------------------|-------------------------------------------------|
|                                 | Cl                                                                                  |                                                                                      | NO <sub>3</sub>                                                                       |                                                                                     |                                                 |
|                                 | Without NO                                                                          | With NO                                                                              | OH                                                                                    |                                                                                     |                                                 |
| 1                               |    |    |    |  | Unidentified                                    |
| 2.18<br>All channels            |    |    |    |  | Acetone                                         |
| 2.65<br>Channel III             |    |                                                                                      |                                                                                       |                                                                                     | <chem>CC(=O)CO</chem><br>Hydroxyacetone         |
| 3.43 (3.08)<br>Channel I and II |   |   |   |                                                                                     | <chem>CC(C)C=O</chem><br>2,2-dimethyl-propanal  |
| 5.82<br>(5.48)<br>Channel I     |  |  |  |                                                                                     | <chem>CC(C)CO</chem><br>2,2-dimethylpropan-1-ol |

|                              |  |  |  |  |                                                                    |
|------------------------------|--|--|--|--|--------------------------------------------------------------------|
| 6.01<br>(5.70)*              |  |  |  |  | 3,3-dimethyl-butanal<br>(reactant)                                 |
| 6.97(6.68)*<br>Channel II    |  |  |  |  | Nitrated compound                                                  |
| 7.16<br>Channel I            |  |  |  |  | Nitrated compound                                                  |
| 7.88<br>Channel II           |  |  |  |  | <br>4-oxo-3,3-dimethylbutanoic acid??                              |
| 8.23**                       |  |  |  |  | <br>2,2-dimethylpropanoic acid<br>2,2-dimethylbutanal              |
| 8.26                         |  |  |  |  | <br>3,3-dimethyl-2-oxo-butanal                                     |
| 9.56<br>(8.95)*<br>Channel I |  |  |  |  | <br>4-oxo-3,3-dimethylbutanoic acid??<br>3,3-dimethylbutanoic acid |

|                      |  |  |  |  |                                                                                  |
|----------------------|--|--|--|--|----------------------------------------------------------------------------------|
| 13.25<br>Channel III |  |  |  |  | <p>2,2-dimethyl tetrahydrofuran-2-one</p>                                        |
| 15.78<br>Channel III |  |  |  |  | <p>4-hydroxy-3,3-dimethyl butanal</p><br><p>Or 2,3-dihydro-4,4-dimethylfuran</p> |
| 16.15<br>Channel III |  |  |  |  | <p>3-hydroxy-2,2-dimethyl-propanal</p>                                           |
| 20.91<br>Channel III |  |  |  |  | <p>2,2-dimethylpropane-1,3-diol</p>                                              |

- \*tr for OH and NO<sub>3</sub> experiment. Shorter Time retention than Cl experiments due to a new chromatographic column.
- \*\*Secondary product. At large time reaction
